# Supplementary material for: Differential Impact of Random GC Tetrad Binding and Chromatin Events on Transcriptional Inhibition by Olivomycin A
Source: MDPI journal article supplement (doi:10.3390/ijms23168871), 2022-08-09
Supplement: s1 [file s1]

## Supplement Materials

### Scheme S1. Minimal CMVwt sequence.

ACGCGT CGAGGTA GCGGTGTACGGTGGA EGCC TATATAAGCAGAGCTCGTTT AGTGAACCGTCAGAT CGC  
CTGGAGA CGCC ATCCACGCTGTTT GACCTCCATAGAAGACA CCGGG ACCGATCCAGCCTCCTGGTA CCATG  
GAAGACGCCAAAAACATAAAAGAAAGGCCCGGCCATTCTATCCGCTGGAAGATGGAACCGCTGGAGAGC  
AACTGCATAAGGCTATGAAGAGATACGCCCTGGTTCCTGGAACAATTGCTTTACAGATGCACATATCGAGG  
TGGACATCACTTACGCTGAGTACTTCGAAATGTCCGTTTCGGTTGGCAGAAGCTATGAAACGATATGGGCTGA  
ATACAAATCACAGAATCGTCGTATGCAGTGAAAACCTCTCTTCAATTCTTTATGCCGGTGTGGGCGCGTTATT  
TATCGGAGTTGCAGTTGCGCCCGCAACGACATTTATAATGAACGTGAATTGCTCAACAGTATGGGCATTTCT  
GCAGCCTACCGTGGTGTTCGTTTCCAAAAAGGGGTTCGCAAAAAATTTGAACGTGCAAAAAAAGCTCCCAAT  
CATCCAAAAAATTATTATCATGGATTCTAAAACGGATTACCAGGGATTTCAGTCGATGTACACGTTTCGTAC  
ATCTCATCTACCTCCCGGTTTTAATGAATACGATTTTGTGCCAGAGTCCTTCGATAGGGACAAGACAATTGCA  
CTGATCATGAACCTCTCTGGATCTACTGGTCTGCCTAAAGGTGTGCTCTGCCTCATAGAAGTGCCTGCGTGA  
GATTCTCGCATGCCAGAGATCCTATTTTTGGCAATCAAATCATTCCGGATACTGCGATTTTAAGTGTGTTCCTA  
TTCCATCACGGTTTTTGAATGTTTACTACACTCGGATATTTGATATGTGGATTTTCGAGTCGTCTTAATGTATAG  
ATTTGAAGAAGAGCTGTTTCTGAGGAGCCTTCAGGATTACAAGATTCAAAGTGCCTGCTGGTGCCAACCCCT  
ATTCTCCTTCTTCGCCAAAAGCACTCTGATTGACAAATACGATTTATCTAATTTACACGAAATTGCTTCTGGTG  
GCGCTCCCCTCTCTAAGGAAGTCGGGGAAGCGGTTGCCAAGAGGTTCCATCTGCCAGGTATCAGGCAAGGA  
TATGGGCTCACTGAGACTACATCAGCTATTCTGATTACACCCGAGGGGGATGATAAACCGGGCGCGGTTCGGT  
AAAGTTGTTCCATTTTTTGAAGCGAAGGTTGTGGATCTGGATACCGGGAAAACGCTGGGCGTTAATCAAAGA  
GGCGAACTGTGTGTGAGAGGTCCTATGATTATGTCCGGTTATGTAAACAATCCGGAAGCGACCAACGCCTTG  
ATTGACAAGGATGGATGGCTACATTCTGGAGACATAGCTTACTGGGACGAAGACGAACACTTCTTCATCGTT  
GACCGCCTGAAGTCTCTGATTAAGTACAAAGGCTATCAGGTGGCTCCCGCTGAATTGGAATCCATCTTGCTC  
CAACACCCCAACATCTTCGACGCAGGTGTGCGAGGTCTTCCCGACGATGACGCCGGTGAACCTCCCGCCGCC  
GTTGTTGTTTTGGAGCACGGAAAGACGATGACGGAAAAAGAGATCGTGGATTACGTCGCCAGTCAAGTAAC  
AACCGCGAAAAAGTTGCGCGGAGGAGTTGTGTTTGTGGACGAAGTACCGAAAGGTCTTACCGGAAAACTCG  
ACGCAAGAAAAATCAGAGAGATCCTCATAAAGGCCAAGAAGGGCGGAAAGATCGCCGTGTAAT

Color codes: yellow, restriction sites for MluI (left) and NcoI (right) used in ligation and cloning; green, OA putative OA binding sites; gray, *Luc* CDS.

**Scheme S2.** Minimal CMVmut sequence.

ACGCGT CGAGGTAC ACGTGTACGGTGGGA GACCTATATAAGCAGAGCTCGTTTAGTGAACCGTCAGATC AC  
GTGGAGAC ACCATCCACGCTGTTTTGACCTCCATAGAAGACAC CAGG ACCGATCCAGCCTCCTGGTACCATG  
GAAGACGCCAAAAACATAAAGAAAGGCCCGGCCATTCTATCCGCTGGAAGATGGAACCGCTGGAGAGC  
AACTGCATAAGGCTATGAAGAGATACGCCCTGGTTCCTGGAACAATTGCTTTTACAGATGCACATATCGAGG  
TGGACATCACTTACGCTGAGTACTTCGAAATGTCCGTTCCGTTGGCAGAAGCTATGAAACGATATGGGCTGA  
ATACAAATCACAGAATCGTCGTATGCAGTGAAAACCTCTCTTCAATTCTTTATGCCGGTGTGGGCGCGTTATT  
TATCGGAGTTGCAGTTGCGCCCGCAACGACATTTATAATGAACGTGAATTGCTCAACAGTATGGGCATTTCT  
GCAGCCTACCGTGGTGTTCGTTTCCAAAAAGGGGTGCAAAAAATTTGAACGTGCAAAAAAAGCTCCCAAT  
CATCCAAAAAATTATTATCATGGATTCTAAAACGGATTACCAGGGATTTAGTCGATGTACACGTTCTGCAC  
ATCTCATCTACCTCCCGTTTTAATGAATACGATTTTGTGCCAGAGTCCTTCGATAGGGACAAGACAATTGCA  
CTGATCATGAACTCCTCTGGATCTACTGGTCTGCCTAAAGGTGTCGCTCTGCCTCATAGAACTGCCTGCGTGA  
GATTCTCGCATGCCAGAGATCCTATTTTTGGCAATCAAATCATTCGGATACTGCGATTTTAAGTGTGTTCCA  
TTCCATCACGGTTTTTGAATGTTTACTACACTCGGATATTTGATATGTGGATTTTCGAGTCGTCTTAATGTATAG  
ATTTGAAGAAGAGCTGTTTCTGAGGAGCCTTCAGGATTACAAGATTCAAAGTGCGCTGCTGGTGCCAACCCT  
ATTCTCCTTCTTCGCCAAAAGCACTCTGATTGACAAATACGATTTATCTAATTTACACGAAATTGCTTCTGGTG  
GCGCTCCCCTCTCTAAGGAAGTCGGGGAAGCGGTTGCCAAGAGGTTCCATCTGCCAGGTATCAGGCAAGGA  
TATGGGCTCACTGAGACTACATCAGCTATTCTGATTACACCCGAGGGGGATGATAAACCGGGCGCGGTCCGT  
AAAGTTGTTCCATTTTTTGAAGCGAAGGTTGTGGATCTGGATACCGGGAAAACGCTGGGCGTTAATCAAAGA  
GGCGAACTGTGTGTGAGAGGTCCTATGATTATGTCCGGTTATGTAAACAATCCGGAAGCGACCAACGCCTTG  
ATTGACAAGGATGGATGGCTACATTCTGGAGACATAGCTTACTGGGACGAAGACGAACACTTCTTCATCGTT  
GACCGCCTGAAGTCTCTGATTAAGTACAAAGGCTATCAGGTGGCTCCCGCTGAATTGGAATCCATCTTGCTC  
CAACACCCCAACATCTTCGACGCAGGTGTCCGAGGTCTTCCCGACGATGACGCCGGTGAACCTCCCGCCGCC  
GTTGTTGTTTTGGAGCACGGAAAGACGATGACGGAAAAAGAGATCGTGGATTACGTCGCCAGTCAAGTAAC  
AACCGCGAAAAAGTTGCGCGGAGGAGTTGTGTTGTGGACGAAGTACCGAAAGGTCTTACCGGAAAACTCG  
ACGCAAGAAAAATCAGAGAGATCCTCATAAAGGCCAAGAAGGGCGGAAAGATCGCCGTGTAAT

Color codes: yellow, green and gray as in Scheme S1; red, sites of single nucleotide mutation G to A.

**Table S1.** Primers used for qRT-PCR and ChIP.

| Sequence                                                  | Name             | Method           |
|-----------------------------------------------------------|------------------|------------------|
| For ACTGGAGACAAAGTGGGAGCC<br>Rev CAGACACTGGCAACATTGCG     | RPLP0_mRNA       | qRT-PCR          |
| For CACCGAGTCGTAGTCGAGGT<br>Rev TTTCGGGTAGTGGAAAACCA      | Myc_mRNA         | qRT-PCR          |
| For CGAGGTAGGCGTGTACGGTG<br>Rev CAGGAGGCTGGATCGGTCC       | Luc_promoter     | qRT-PCR<br>/ChIP |
| For GCACATATCGAGGTGGACATCA<br>Rev TCAGCCCATATCGTTTCATAGC  | Luc+0.2          | qRT-PCR<br>/ChIP |
| For TCAACAGTATGGGCATTTTCGC<br>Rev GTGACGAACGTGTACATCGACTG | Luc+0.4          | qRT-PCR<br>/ChIP |
| For CAACCCTATTCTCCTTCTTCGC<br>Rev GATACCTGGCAGATGGAACCTC  | Luc+1            | qRT-PCR<br>/ChIP |
| For TTCTCAGAGGCTTGGCGGGA<br>Rev GCAGCTCTGCTCGCCCCG        | MYC(h)_ChIP+0.1  | ChIP             |
| For TGGAGAGGGAAGGTTGGGAG<br>Rev TGAAGGAGAAGGCGAGAGGC      | Myc_ChIP+1.5     | ChIP             |
| For CGAGGAGAATGTCAAGAGGCG<br>Rev GGACAGGATGTATGCTGTGGC    | Myc_ChIP+4.85    | ChIP             |
| For CTGCTTGCCGCCCTCTTTGG<br>Rev CACAGCCAGACGGACAATGAG     | SLC38A2_mRNA     | qRT-PCR          |
| For CGTATCCGCATCCACATCCAC<br>Rev TGCTCGTCCCACCTTCCTCAAG   | PHLDA1_mRNA      | qRT-PCR          |
| For TCATACTCGGGCAAGGCAGC<br>Rev GAGGCAGCGAACCAGACAGC      | TRIB3_mRNA       | qRT-PCR          |
| For CAGTCGTCCTTGCTGGATGTG<br>Rev CCAGGAGAACTGCCACAGC      | ETS2_mRNA        | qRT-PCR          |
| For TTAACCACAACCCCGACGC<br>Rev CCCGTGTTTTCTGCCGTAA        | LHX2_mRNA        | qRT-PCR          |
| For GAGCTTTTGGTGTCTTGGGT<br>Rev CTCTCTGGCAGCATCTGAAGG     | NFkBIA_mRNA      | qRT-PCR          |
| For TGAGCCGCGACTGTGATG<br>Rev GTCTCGGTGACAAAGTCGAAGTT     | P21_mRNA         | qRT-PCR/<br>ChIP |
| For AAAACTCGACGCAGAGCTGTG<br>Rev AGGTGAGAAGCAGGTTGTGGAC   | ARL6IP1_mRNA     | qRT-PCR          |
| For GGCTTCCACACAACCTCCAGTG<br>Rev CCGCTGTAGGTTTCATGGTGG   | TMEM123_mRNA     | qRT-PCR          |
| For CGGTGGTCTCTATTCTCACGCAG<br>Rev TTCCCTTGACACGGCGGACG   | SLC38A2_ChIP_TSS | ChIP             |
| For CTTCAATGTTGTTAATGCCTGG<br>Rev GCACAGAATGGTGACACATGCG  | SLC38A2_ChIP_CDS | ChIP             |
| For GCAGCCGCTACTCTCCAGCATC<br>Rev TCTGCCTCCTGCGTGTAGCC    | PHLDA1_ChIP_TSS  | ChIP             |
| For GAGGCTGAGACAGGAGAATGGC<br>Rev GGCTCCCTCTTGGTGGCTGG    | PHLDA1_ChIP_CDS  | ChIP             |
| For GTGTTACACGCACGCACGCC<br>Rev CCGCACGCCCTCCTCTAGG       | TRIB3_ChIP_TSS   | ChIP             |
| For GAAGCGGTTGGAGTTGGATGAC<br>Rev CGGGCTCCAGGAGGACATAGG   | TRIB3_ChIP_CDS   | ChIP             |
| For GCGATCAGCACCACGACTCG                                  | ETS2_ChIP_TSS    | ChIP             |

|                                                            |                  |      |
|------------------------------------------------------------|------------------|------|
| Rev GTGGCACCGAAGGGCAGCCG                                   |                  |      |
| For GCCGTCCGATTGTTCTGTTCC<br>Rev TGCTGCCTGGGAAGTCCTGACT    | ETS2_ChIP_CDS    | ChIP |
| For GGAGAAACCCCTACTCCAGTCG<br>Rev GTTCACCCTGAAGCCGCTAGG    | LHX2_ChIP_TSS    | ChIP |
| For GCCTCGGAGATGGTGATGCG<br>Rev CGGCATGGTTGAAGTGTGCG       | LHX2_ChIP_CDS    | ChIP |
| For CAGAGGACGAAGCCAGTTCTC<br>Rev GCCCTATAAACGCTGGCTGG      | NFkBIA_ChIP_TSS  | ChIP |
| For CTCTTCCCCACAGGTTCCCTG<br>Rev GCAGGTTGTTCTGGAAGTTGAG    | NFkBIA_ChIP_CDS  | ChIP |
| For TAGCCCAGATTCCCTCTCCG<br>Rev GCTCCAAGATGCTTTTCCTCAC     | P21_ChIP_TSS     | ChIP |
| For GGGGACAGGCAGCCAGGAC<br>Rev CTCGGGTTGTGGTTGGTGTG        | ARL6IP1_ChIP_TSS | ChIP |
| For CGGACAGAACAGATGGATCTAGA<br>Rev CTCTGAGAGGCGGTGAATAGTTA | ARL6IP1_ChIP_CDS | ChIP |
| For GCAGCCACTTACCCGCCATG<br>Rev CGAAGGGGAAGCGGAGCCG        | TMEM123_ChIP_TSS | ChIP |
| For GGCAGTAGGGCAGGTTATTGG<br>Rev CTGGGCTTCCACACAACCTCC     | TMEM123_ChIP_CDS | ChIP |
